# Supplementary material
Source: publisher site journal article supplement (https://www.dovepress.com/article/483176)
Supplement: Supplementary file 1 [file get_supplementary_file.php]

# Supplementary Material

## Modeling details related to the analysis of spirometry endpoints

A mixed-effects repeated-measures model (MMRM) with a compound symmetric covariance structure was used to assess Day 1 forced expiratory volume in 1 second (FEV1) by postdose time point (**Figure 1**). The model included terms for treatment group, smoking status (current or former smoker), reversibility status (not reversible to either ipratropium [500 µg solution via jet nebulizer] or albuterol metered dose inhaler [90 µg per puff, 4 puffs administered], reversible to albuterol and not to ipratropium, reversible to ipratropium and not to albuterol, reversible to both ipratropium and albuterol), concomitant long-acting beta-agonist use at baseline (yes, no), sex (male, female), and age at baseline (≤65 years or >65 years). A covariate for Day 1 baseline FEV1 was included. The same modeling approach was used for the substudy assessment of Day 84 FEV1 by postdose time point (**Figure 2**).

All Day 84 FEV1 endpoints except area under the FEV1 vs time curve (FEV1 AUC) from 0 to 12 hours, 12 to 24 hours, and 0 to 24 hours (FEV1 AUC0–24h) were assessed by fitting analysis of covariance models with Day 1 baseline FEV1 as the covariate. The 3 endpoints unique to the serial spirometry substudy were assessed by fitting a corresponding MMRM with the same covariate and additional terms for interval (0-12 hours or 12-24 hours) and interval by treatment and interval by covariate interactions. There was no separate analysis of FEV1 AUC0-24h; it was analyzed as the average across the two 12-hour intervals.

**Supplemental Table 1**. Short-Term (0 to 2 Hours) Increase in FEV1 of Revefenacin at Day 1

| **FEV1 (mL) Change From Baseline** | **Revefenacin 175 μg**  **(n = 89)** | **Placebo**  **(n = 83)** |
| --- | --- | --- |
| **5 minutes** |  |  |
| LS Mean (SE) | 56 (18) | –60 (19) |
| LS Mean Difference (SE) | 116 (24) | - |
| 95% CI for LS Mean Difference (SE) | (69, 163) |  |
| *P*-value | <0.001 | - |
| **15 minutes** |  |  |
| LS Mean (SE) | 116 (18) | –29 (19) |
| LS Mean Difference (SE) | 145 (23) | - |
| 95% CI for LS Mean Difference (SE) | (99, 191) | - |
| *P*-value | <0.001 | - |
| **30 minutes** |  |  |
| LS Mean (SE) | 148 (18) | –9 (19) |
| LS Mean Difference (SE) | 157 (24) | - |
| 95% CI for LS Mean Difference (SE) | (110, 203) | - |
| *P*-value | <0.001 | - |
| **1 hour** |  |  |
| LS Mean (SE) | 162 (18) | 23 (19) |
| LS Mean Difference (SE) | 139 (24) | - |
| 95% CI for LS Mean Difference (SE) | (92, 186) | - |
| *P*-value | <0.001 | - |
| **2 hours** |  |  |
| LS Mean (SE) | 173 (18) | 26 (19) |
| LS Mean Difference (SE) | 147 (23) | - |
| 95% CI for LS Mean Difference (SE) | (101, 193) | - |
| *P*-value | <0.001 | - |

Baseline is defined as the average of the predose assessments at 45 and 15 minutes before dosing.

CI, confidence interval; FEV1, forced expiratory volume at 1 second; LS, least squares; SD, standard deviation; SE, standard er
